# Supplementary material
Source: PubMed Central journal article supplement (PMC3340184)
Supplement: supp_M111.321646_jbc.M111.321646-1.pdf [file supp_M111.321646_jbc.M111.321646-1.pdf]

Figure S1. Santhekadur et al.

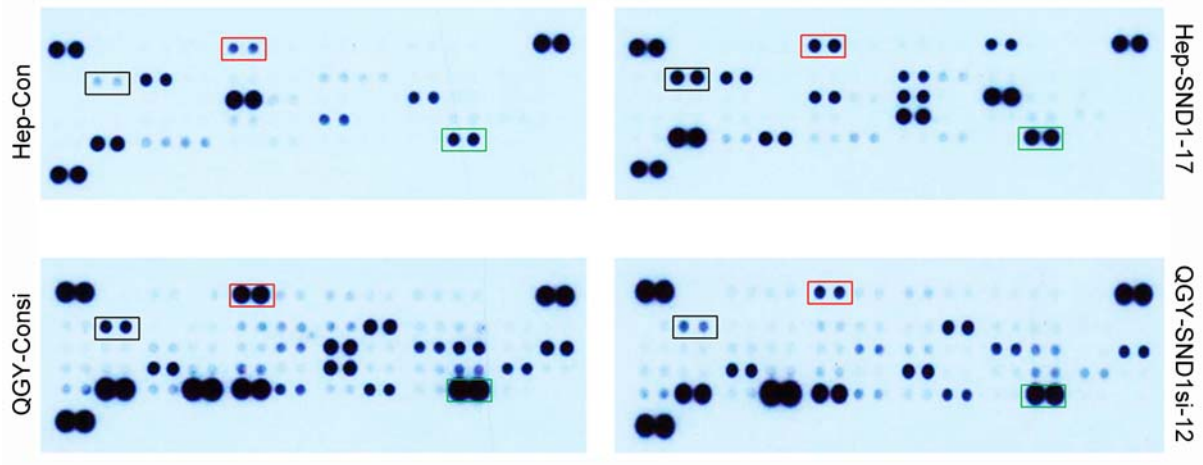

Fig. S2. Santhekadur et al.

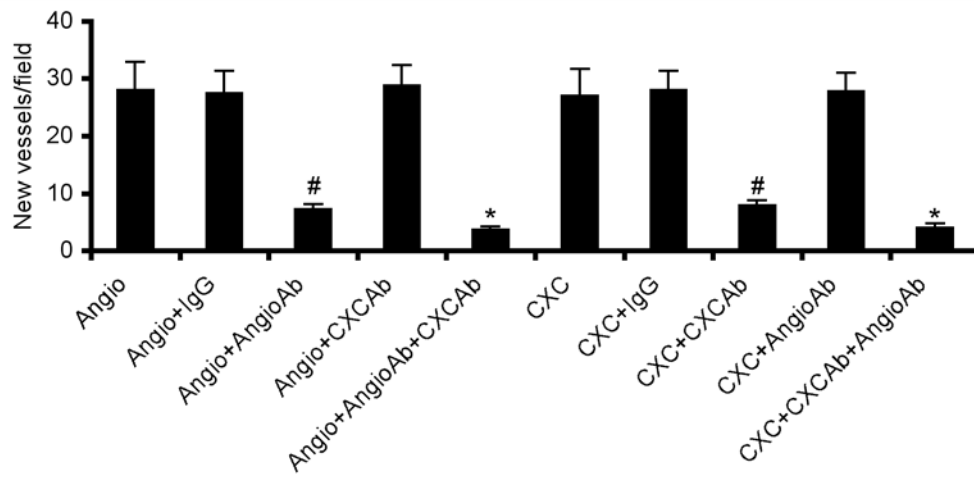

Fig. S3. Santhekadur et al.

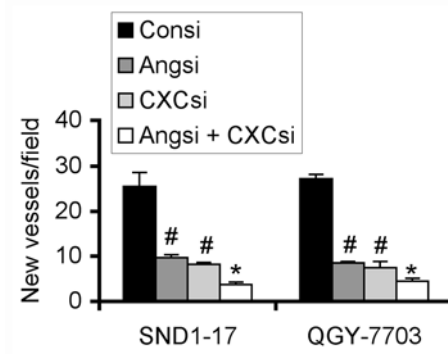

Fig. S4. Santhekadur et al.

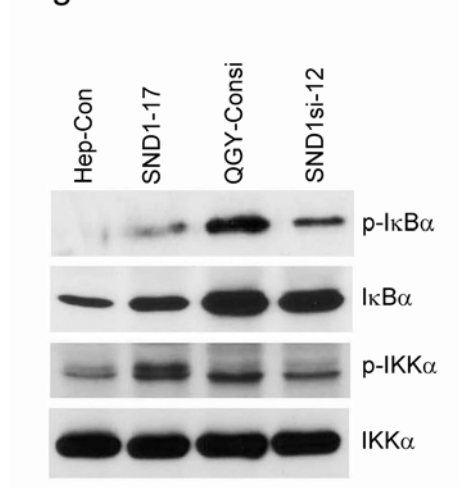

## Legends to Supplementary Figures

Fig. S1. SND1 modulates expression of angiogenic factors. A human angiogenesis array was screened using conditioned media (CM) from the indicated cells. Red, black and green boxes represent Angiogenin, CXCL16 and VEGF, respectively.

Fig. S2. Angiogenin and CXCL16 are required for SND1-induced angiogenesis. HUVECs were treated either with CXCL16 (CXC) or Angiogenin (Angio) with or without corresponding neutralizing antibody either alone or in combination and tube formation was quantified. Isotype specific IgG was used as control. The experiments were performed twice using triplicates per group. The data represents mean  $\pm$  SEM. # and \*:  $p < 0.05$ . # compares Angiogenin alone with Angiogenin + Anti-angiogenin Ab or CXCL16 alone with CXCL16 + Anti-CXCL16 Ab. \* compares Angiogenin + Anti-angiogenin Ab with Angiogenin + Anti-angiogenin Ab + Anti-CXCL16 Ab or CXCL16 + Anti-CXCL16 antibody with CXCL16 + Anti-CXCL16 antibody + Anti-Angiogenin Ab.

Fig. S3. Inhibition of Angiogenin and CXCL16 abrogates SND1-induced angiogenesis. Hep3B-SND1-17 and QGY-7703 cells were transfected either with control siRNA (Consi) or Angiogenin siRNA (Angsi) and CXCL16 siRNA (CXCsi), either alone or in combination, and the conditioned media (CM) was subjected to tube formation assay. The experiments were performed twice using triplicates per group. The data represents mean  $\pm$  SEM. # and \*:  $p < 0.05$ . # compares Control siRNA with Angiogenin siRNA or CXCL16 siRNA. \* compares Angiogenin siRNA or CXCL16 siRNA with the combination of Angiogenin siRNA and CXCL16 siRNA.

Fig. S4. SND1 activates IKK $\alpha$ . The expression of phospho-I $\kappa$ B $\alpha$ , total I $\kappa$ B $\alpha$ , phospho-IKK $\alpha$  and total IKK $\alpha$  was detected by Western blot analysis using lysates from Hep3B-Con, Hep3B-SND1-17, QGY-Consi and QGY-SND1si-12 cells.
